# Supplementary material
Source: Research Square preprint supplement (doi:10.21203/rs.3.rs-9180873/v1)
Supplement: Supplementary file 1 [file ab4ec52280fb877f9138bd98.pdf]

# Supplementary Information — Europe’s extreme temperatures and rainfall in finer detail: strengths and limits of downscaled models

Mira Hulkkonen<sup>1\*</sup>, Akash Deshmukh<sup>1\*</sup>, Tero Mielonen<sup>1</sup>,  
Ian G. Brosnan<sup>2</sup>, Taejin Park<sup>2,3</sup>, Hugo Lee<sup>4</sup>, Weile Wang<sup>2</sup>,  
Bridget Thrasher<sup>2</sup>, Jessica L. McCarty<sup>2</sup>, Harri Kokkola<sup>1,5</sup>,  
Anton Laakso<sup>1</sup>

<sup>1\*</sup>Finnish Meteorological Institute, Yliopistonranta 8, Kuopio, 70210, Finland.

<sup>2</sup>NASA Ames Research Center, Moffett Field, California, 94035, USA.

<sup>3</sup>Bay Area Environmental Research Institute, Moffett Field, California, 94035, USA.

<sup>4</sup>Jet Propulsion Laboratory, California Institute of Technology, 4800 Oak Grove Drive, Pasadena, California, 91109, USA.

<sup>5</sup>University of Eastern Finland, Yliopistonranta 8, Kuopio, 70210, Finland.

\*Corresponding author(s). E-mail(s): [mira.hulkkonen@fmi.fi](mailto:mira.hulkkonen@fmi.fi);  
[akash.deshmukh@fmi.fi](mailto:akash.deshmukh@fmi.fi);

Contributing authors: [tero.mielonen@fmi.fi](mailto:tero.mielonen@fmi.fi); [ian.g.brosnan@nasa.gov](mailto:ian.g.brosnan@nasa.gov);  
[taejin.park@nasa.gov](mailto:taejin.park@nasa.gov); [huikyo.lee@jpl.nasa.gov](mailto:huikyo.lee@jpl.nasa.gov); [weile.wang@nasa.gov](mailto:weile.wang@nasa.gov);  
[bridget@climateanalyticsgroup.org](mailto:bridget@climateanalyticsgroup.org); [jessica.mccarty@nasa.gov](mailto:jessica.mccarty@nasa.gov);  
[harri.kokkola@fmi.fi](mailto:harri.kokkola@fmi.fi); [anton.laakso@fmi.fi](mailto:anton.laakso@fmi.fi);

Content: S1 Model ensemble details; S2 Supplementary Figures

## S1 Model ensemble details

### S1.1 CMIP5 models

**Table S1:** List of climate models included in the CMIP5 dataset

| No. | Climate model | Realization |
|-----|---------------|-------------|
| 1   | CNRM-CM5      | r1i1p1      |
| 2   | IPSL-CM5A-MR  | r1i1p1      |
| 3   | EC-EARTH      | r1i1p1      |
| 4   | HadGEM2-ES    | r1i1p1      |
| 5   | MPI-ESM-LR    | r1i1p1      |
| 6   | NorESM1-M     | r1i1p1      |

### S1.2 EURO-CORDEX models

**Table S2:** List of climate models included in the EURO-CORDEX-11 dataset

| No. | CORDEX model | Driving GCM  | Realization |
|-----|--------------|--------------|-------------|
| 1   | CCLM4        | EC-Earth     | r1i1p1      |
| 2   | RACMO22E     | EC-Earth     | r1i1p1      |
| 3   | RCA4         | EC-Earth     | r12i1p1     |
| 4   | CCLM4        | HadGEM2-ES   | r1i1p1      |
| 5   | RACMO22E     | HadGEM2-ES   | r1i1p1      |
| 6   | RCA4         | HadGEM2-ES   | r1i1p1      |
| 7   | RCA4         | IPSL-CM5A-MR | r1i1p1      |
| 8   | WRF381P      | IPSL-CM5A-MR | r1i1p1      |
| 9   | ALADIN53     | CNRM-CM5     | r1i1p1      |
| 10  | RCA4         | CNRM-CM5     | r1i1p1      |
| 11  | CCLM4        | CNRM-CM5     | r1i1p1      |
| 12  | HIRHAM5      | NorESM1-M    | r1i1p1      |
| 13  | RCA4         | NorESM1-M    | r1i1p1      |
| 14  | REMO2015     | NorESM1-M    | r1i1p1      |
| 15  | CCLM4        | MPI-ESM-LR   | r1i1p1      |
| 16  | RCA4         | MPI-ESM-LR   | r1i1p1      |
| 17  | REMO2009     | MPI-ESM-LR   | r1i1p1      |

### S1.3 CMIP6 models

**Table S3:** List of climate models included in the CMIP6 dataset

| <b>No.</b> | <b>Climate model</b> | <b>Realization</b> |
|------------|----------------------|--------------------|
| 1          | ACCESS-CM2           | r1i1p1f1           |
| 2          | ACCESS-ESM1-5        | r1i1p1f1           |
| 3          | BCC-CSM2-MR          | r1i1p1f1           |
| 4          | CMCC-ESM2            | r1i1p1f1           |
| 5          | CNRM-CM6-1           | r1i1p1f2           |
| 6          | CNRM-ESM2-1          | r1i1p1f2           |
| 7          | CanESM5              | r1i1p1f1           |
| 8          | EC-Earth3            | r1i1p1f1           |
| 9          | EC-Earth3-Veg-LR     | r1i1p1f1           |
| 10         | FGOALS-g3            | r3i1p1f1           |
| 11         | GFDL-CM4             | r1i1p1f1           |
| 12         | GFDL-ESM4            | r1i1p1f1           |
| 13         | GISS-E2-1-G          | r1i1p1f2           |
| 14         | HadGEM3-GC31-LL      | r1i1p1f3           |
| 15         | INM-CM4-8            | r1i1p1f1           |
| 16         | INM-CM5-0            | r1i1p1f1           |
| 17         | IPSL-CM6A-LR         | r1i1p1f1           |
| 18         | KACE-1-0-G           | r1i1p1f1           |
| 19         | KIOST-ESM            | r1i1p1f1           |
| 20         | MIROC-ES2L           | r1i1p1f2           |
| 21         | MIROC6               | r1i1p1f1           |
| 22         | MPI-ESM1-2-HR        | r1i1p1f1           |
| 23         | MPI-ESM1-2-LR        | r1i1p1f1           |
| 24         | MRI-ESM2-0           | r1i1p1f1           |
| 25         | NESM3                | r1i1p1f1           |
| 26         | NorESM2-LM           | r1i1p1f1           |
| 27         | NorESM2-MM           | r1i1p1f1           |
| 28         | TaiESM1              | r1i1p1f1           |
| 29         | UKESM1-0-LL          | r1i1p1f2           |

## S1.4 NEX-GDDP models

**Table S4:** List of climate models included in the NEX-GDDP dataset

| No. | Climate model    | Realization | Version |
|-----|------------------|-------------|---------|
| 1   | ACCESS-CM2       | r1i1p1f1    | v1.0    |
| 2   | ACCESS-ESM1-5    | r1i1p1f1    | v1.0    |
| 3   | BCC-CSM2-MR      | r1i1p1f1    | v1.0    |
| 4   | CMCC-CM2-SR5     | r1i1p1f1    | v1.1    |
| 5   | CMCC-ESM2        | r1i1p1f1    | v1.0    |
| 6   | CNRM-CM6-1       | r1i1p1f2    | v1.0    |
| 7   | CNRM-ESM2-1      | r1i1p1f2    | v1.0    |
| 8   | CanESM5          | r1i1p1f1    | v1.0    |
| 9   | EC-Earth3        | r1i1p1f1    | v1.1    |
| 10  | EC-Earth3-Veg-LR | r1i1p1f1    | v1.0    |
| 11  | FGOALS-g3        | r3i1p1f1    | v1.0    |
| 12  | GFDL-CM4         | r1i1p1f1    | v1.0    |
| 13  | GFDL-ESM4        | r1i1p1f1    | v1.0    |
| 14  | GISS-E2-1-G      | r1i1p1f2    | v1.0    |
| 15  | HadGEM3-GC31-LL  | r1i1p1f3    | v1.0    |
| 16  | INM-CM4-8        | r1i1p1f1    | v1.1    |
| 17  | INM-CM5-0        | r1i1p1f1    | v1.0    |
| 18  | IPSL-CM6A-LR     | r1i1p1f1    | v1.0    |
| 19  | KACE-1-0-G       | r1i1p1f1    | v1.0    |
| 20  | KIOST-ESM        | r1i1p1f1    | v1.0    |
| 21  | MIROC-ES2L       | r1i1p1f2    | v1.0    |
| 22  | MIROC6           | r1i1p1f1    | v1.0    |
| 23  | MPI-ESM1-2-HR    | r1i1p1f1    | v1.0    |
| 24  | MPI-ESM1-2-LR    | r1i1p1f1    | v1.1    |
| 25  | MRI-ESM2-0       | r1i1p1f1    | v1.0    |
| 26  | NESM3            | r1i1p1f1    | v1.0    |
| 27  | NorESM2-LM       | r1i1p1f1    | v1.0    |
| 28  | NorESM2-MM       | r1i1p1f1    | v1.0    |
| 29  | TaiESM1          | r1i1p1f1    | v1.1    |
| 30  | UKESM1-0-LL      | r1i1p1f2    | v1.1    |

## S1.5 CIL GDPCIR models

**Table S5:** List of climate models included in the CIL GDPCIR dataset

| No. | Climate model   | Realization |
|-----|-----------------|-------------|
| 1   | INM-CM5-0       | r1i1p1f1    |
| 2   | FGOALS-g3       | r1i1p1f1    |
| 3   | CanESM5         | r1i1p1f1    |
| 4   | ACCESS-CM2      | r1i1p1f1    |
| 5   | EC-Earth3       | r1i1p1f1    |
| 6   | GFDL-ESM4       | r1i1p1f1    |
| 7   | NorESM2-MM      | r1i1p1f1    |
| 8   | NESM3           | r1i1p1f1    |
| 9   | MIROC6          | r1i1p1f1    |
| 10  | UKESM1-0-LL     | r1i1p1f2    |
| 11  | BCC-CSM2-MR     | r1i1p1f1    |
| 12  | CMCC-CM2-SR5    | r1i1p1f1    |
| 13  | CMCC-ESM2       | r1i1p1f1    |
| 14  | ACCESS-ESM1-5   | r1i1p1f1    |
| 15  | MIROC-ES2L      | r1i1p1f1    |
| 16  | HadGEM3-GC31-LL | r1i1p1f3    |
| 17  | MPI-ESM1-2-HR   | r1i1p1f1    |

## S2 Supplementary Figures

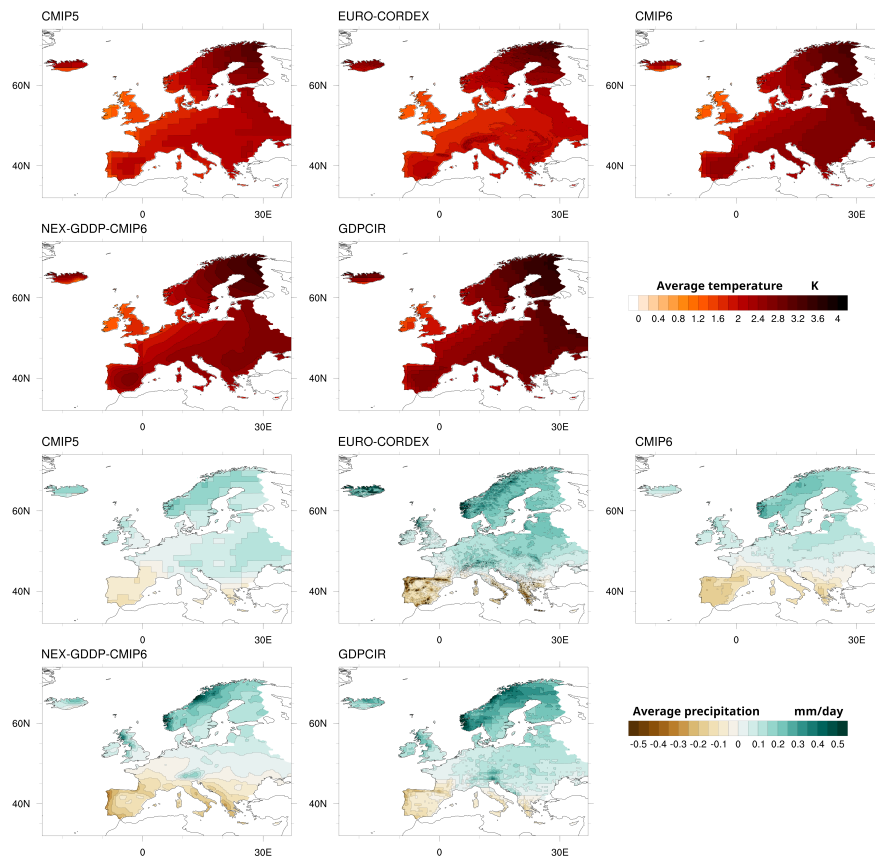

**Fig. S1** Change in average temperature and precipitation projected by different climate model ensembles for future climate (2071-2100) in comparison to 1990-2019 using the scenario SSP2-4.5.

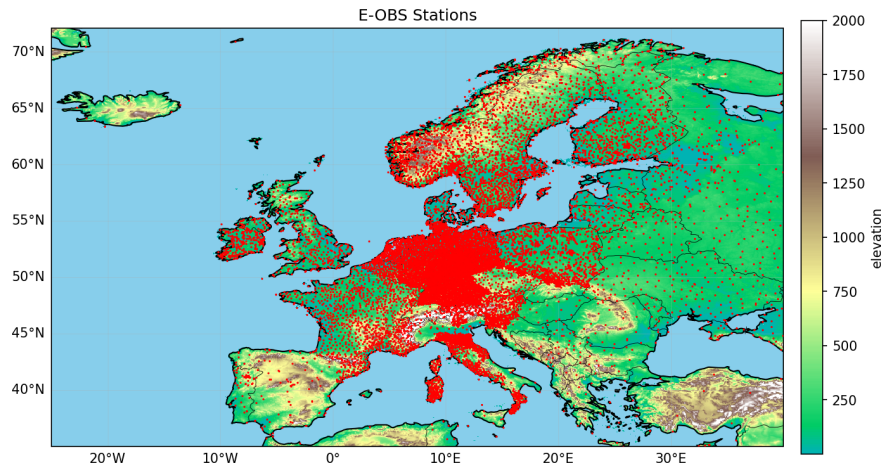

Fig. S2 Weather measurement stations (red points) and geographic altitude across Europe.

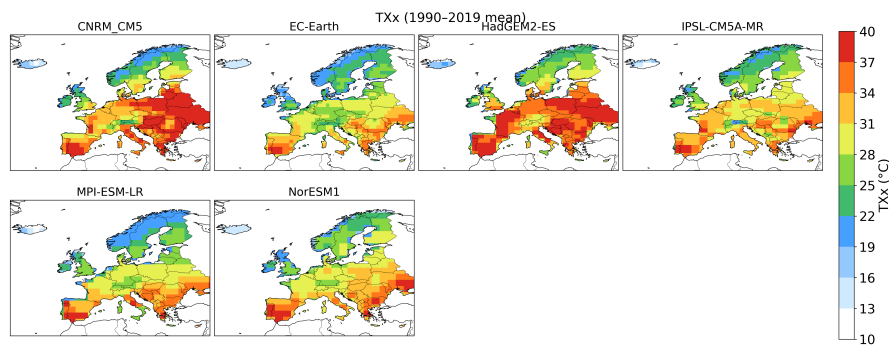

Fig. S3 TXx by each CMIP5 model ensemble member used in this study

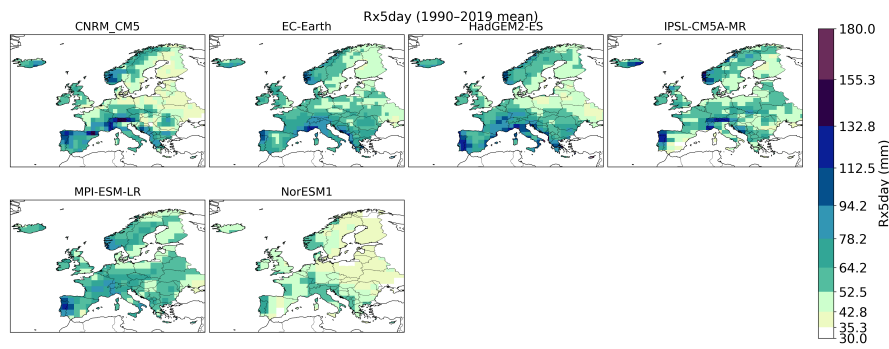

Fig. S4 Rx5day by each CMIP5 model ensemble member used in this study

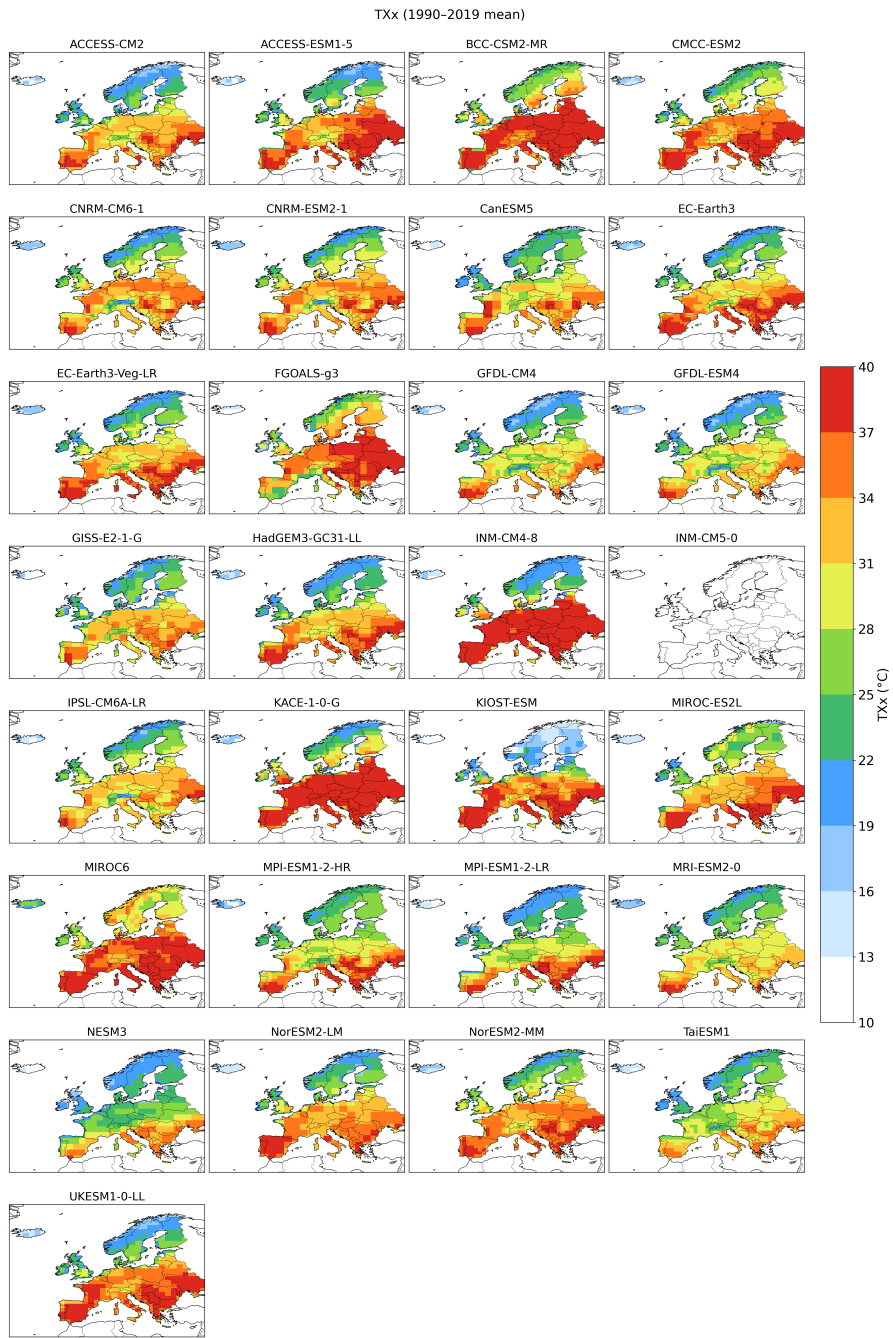

**Fig. S5** TXx by each CMIP6 model ensemble member used in this study

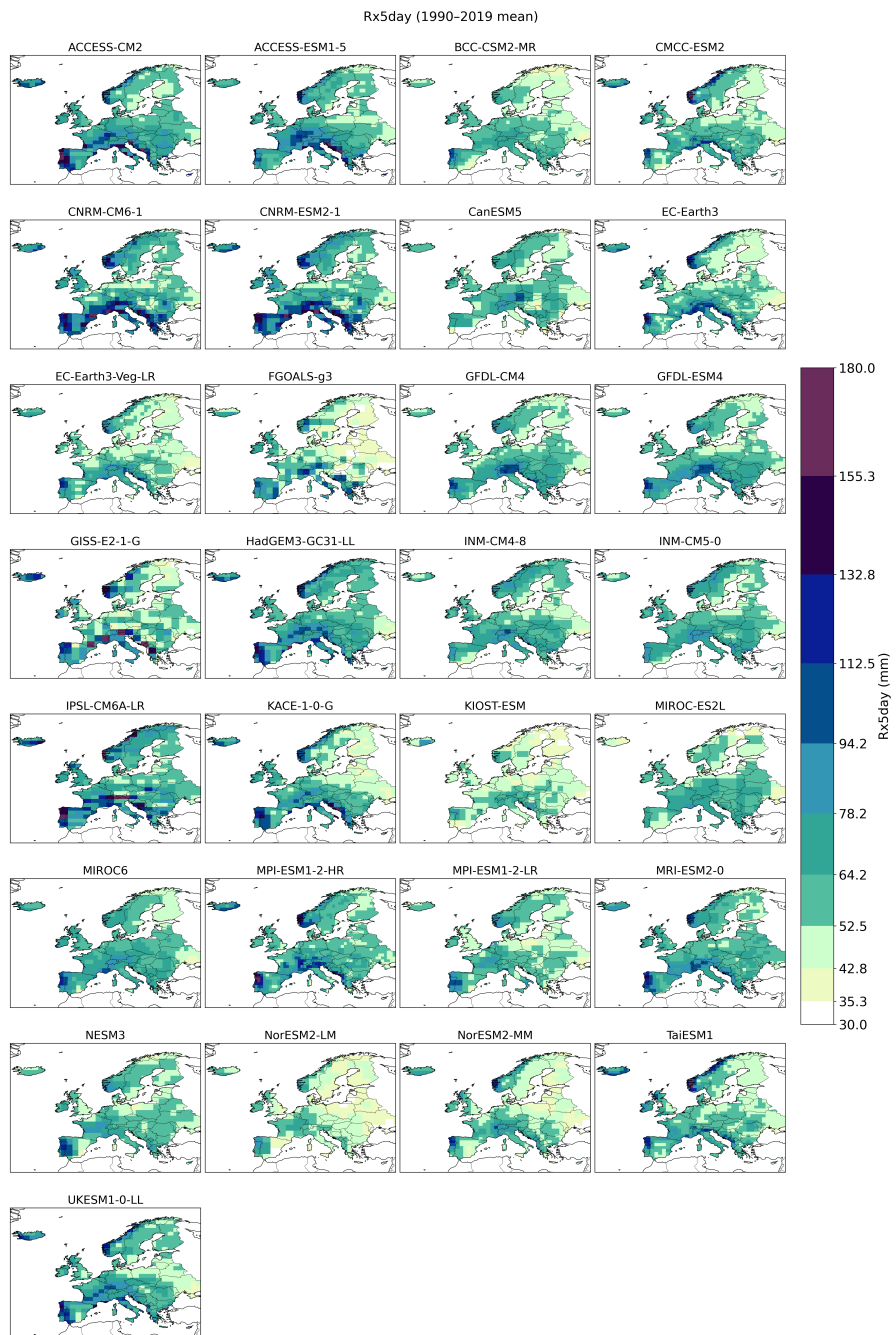

**Fig. S6** Rx5day by each CMIP6 model ensemble member used in this study

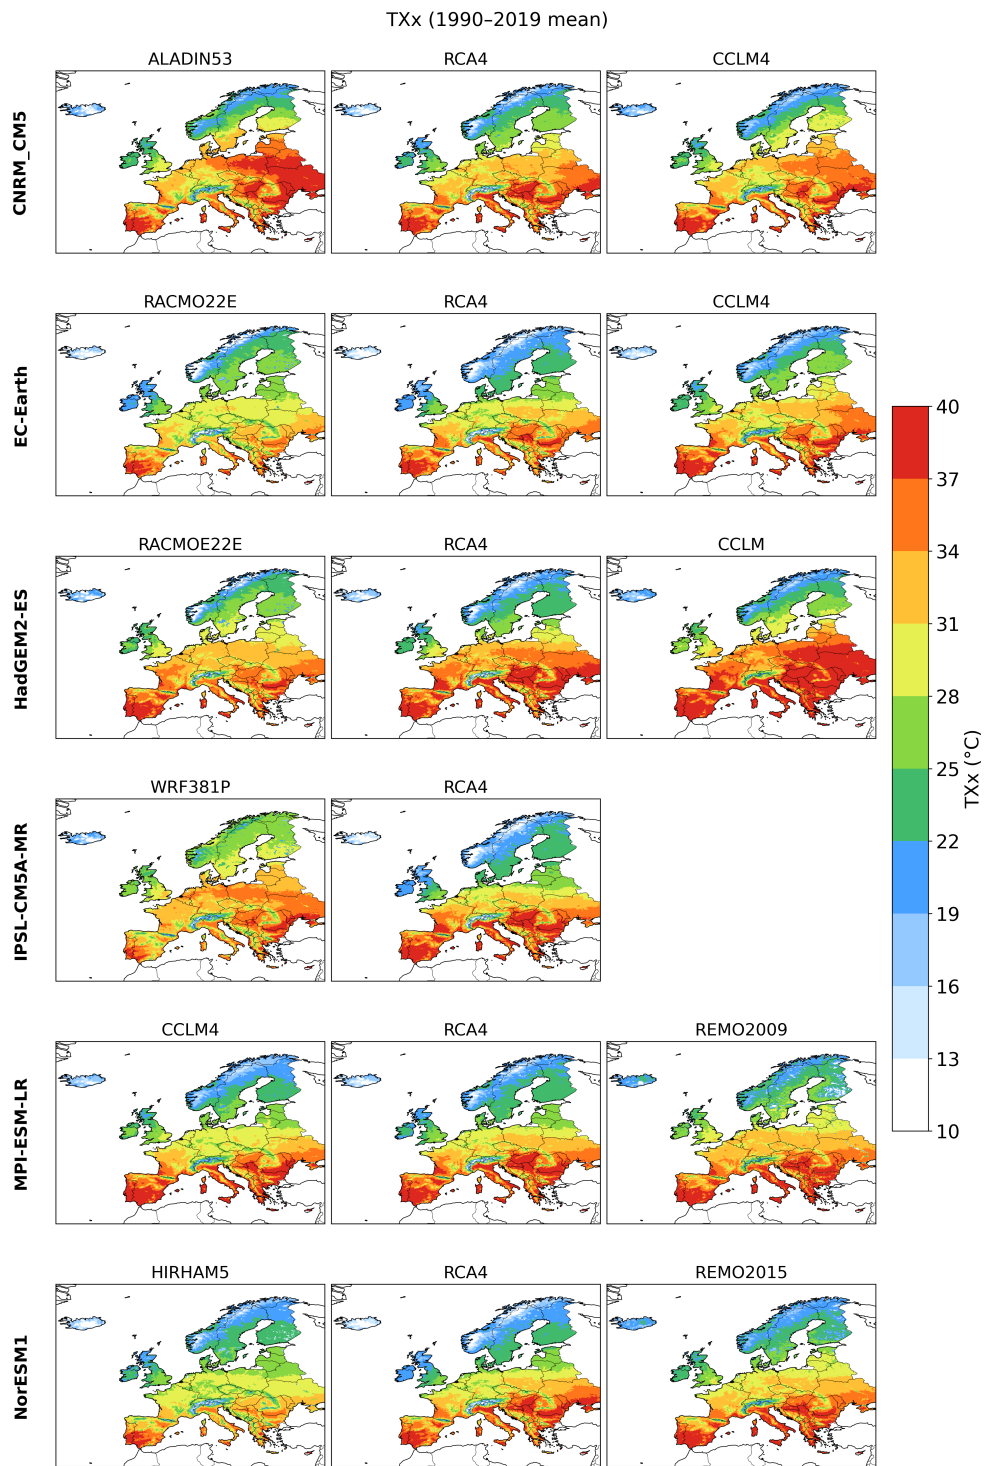

Fig. S7 TXx by each EURO-CORDEX ensemble member used in this study

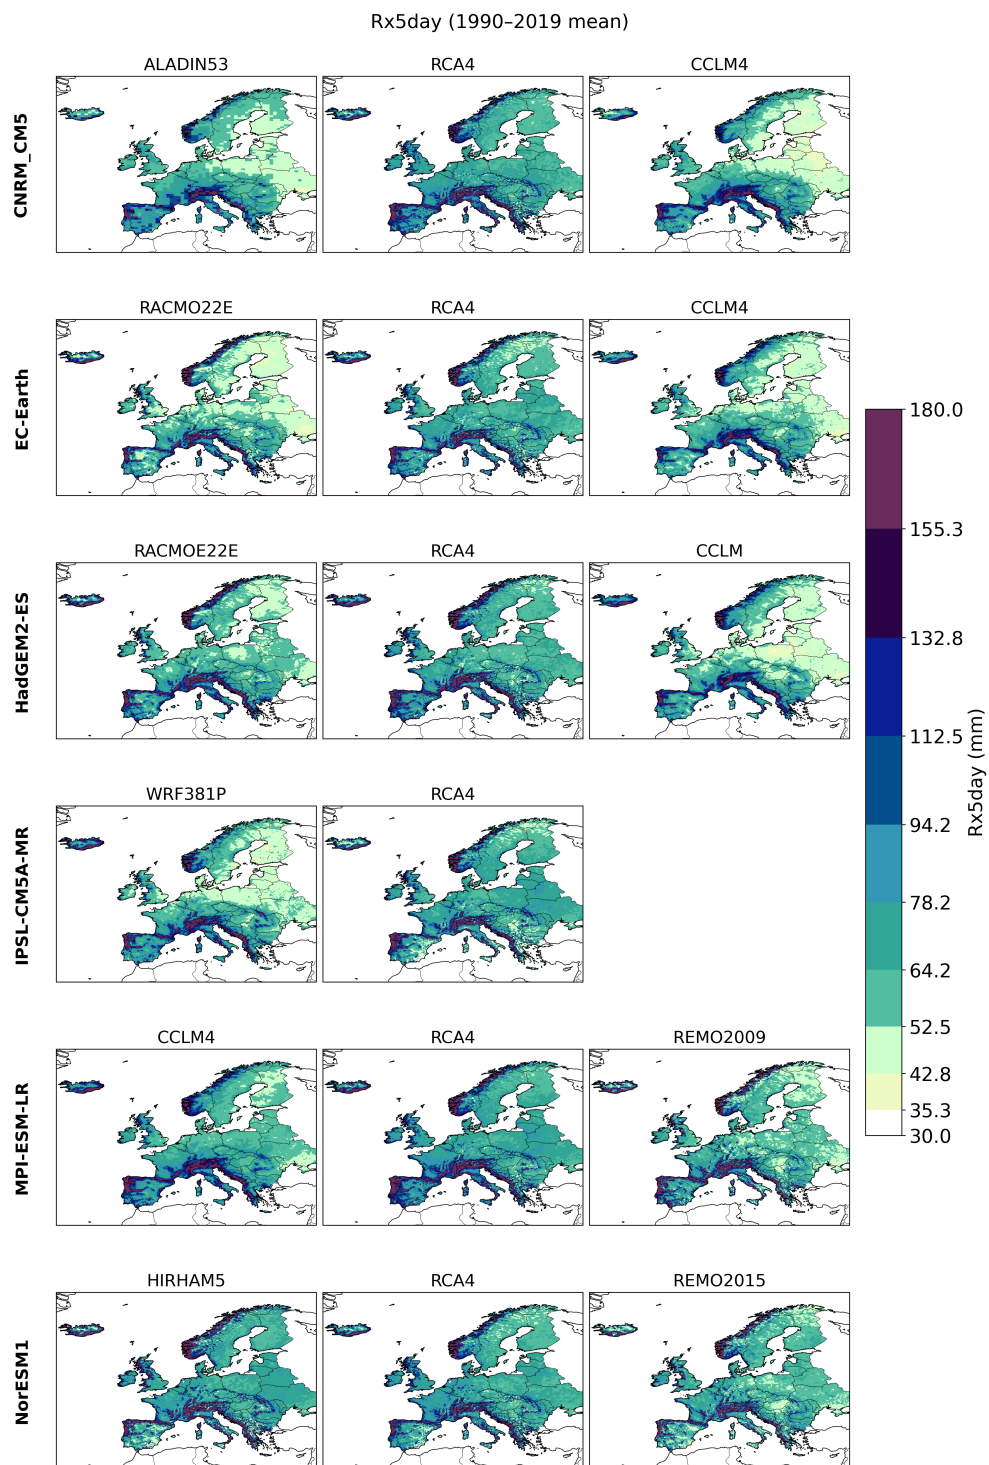

Fig. S8 Rx5day by each EURO-CORDEX model ensemble member used in this study

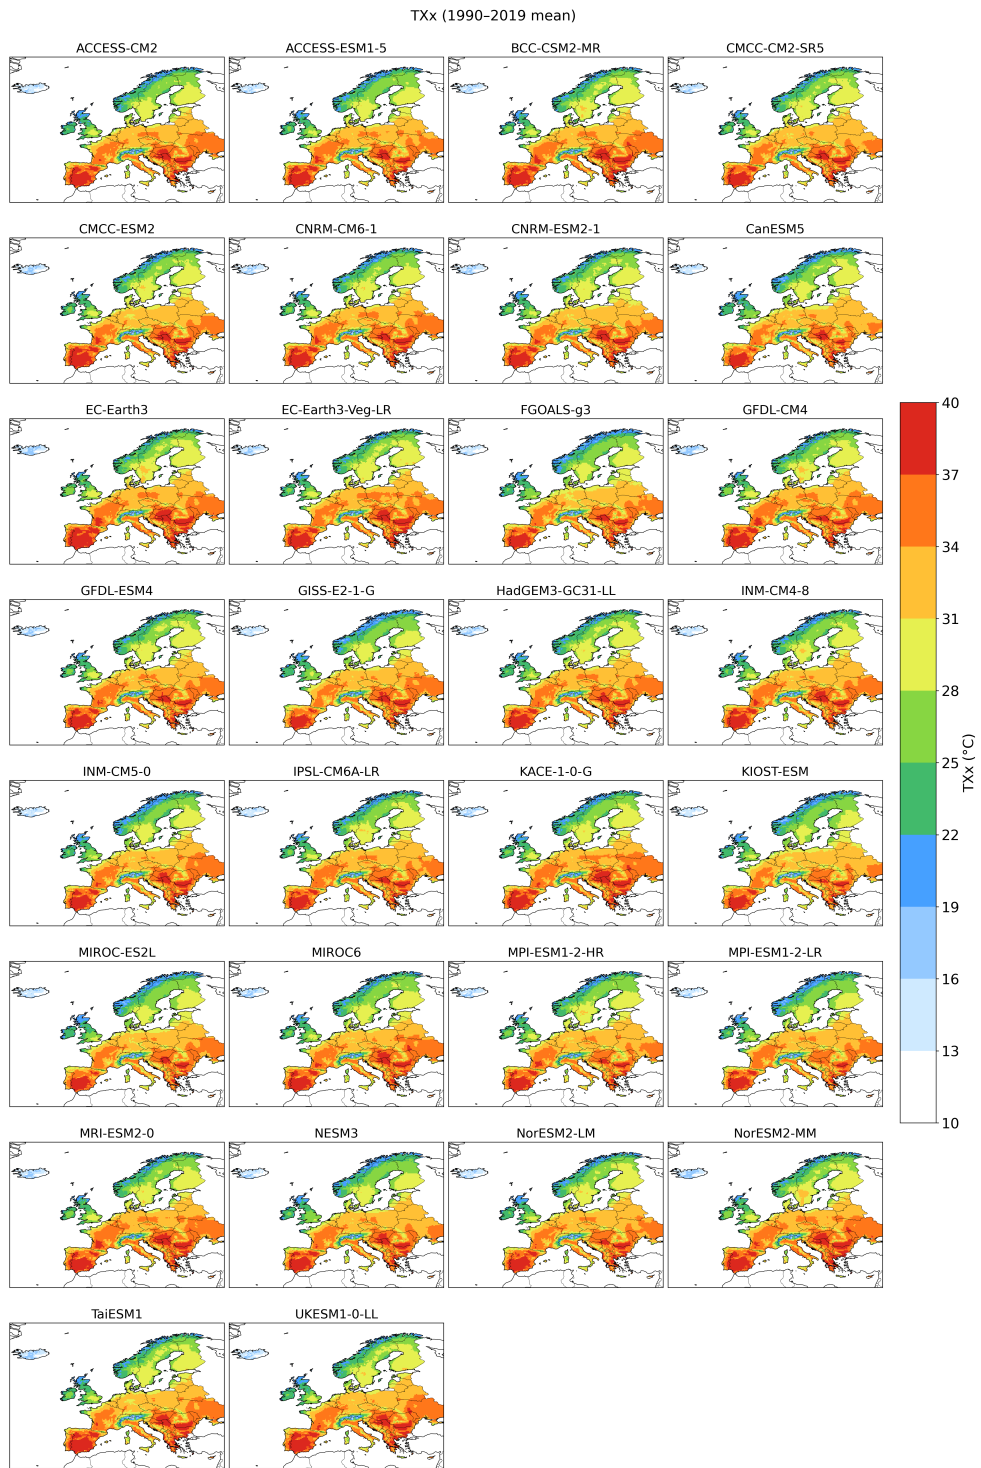

**Fig. S9** TXx by each NEX-GDDP-CMIP6 model ensemble member used in this study

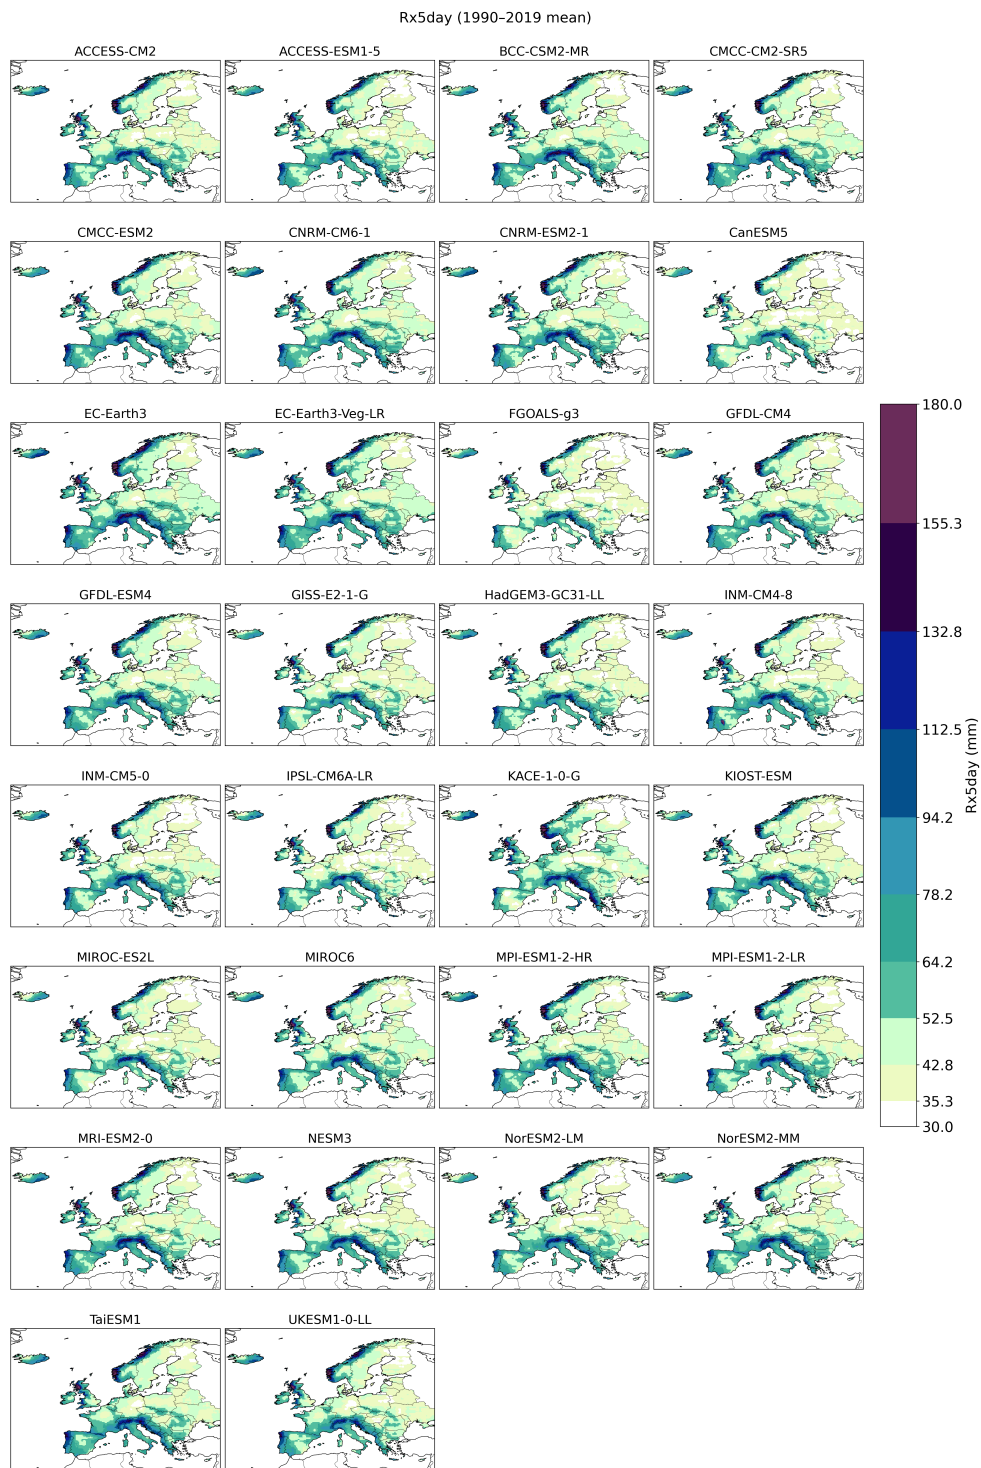

**Fig. S10** Rx5day by each NEX-GDDP-CMIP6 model ensemble member used in this study

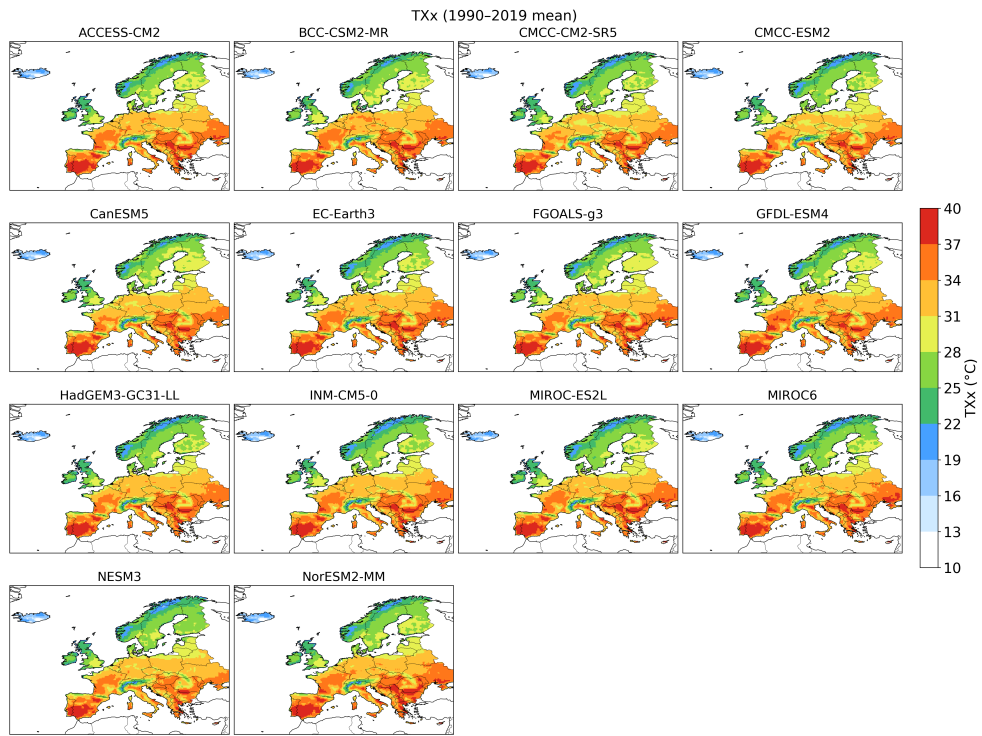

**Fig. S11** TXx by each GDPCIR model ensemble member used in this study

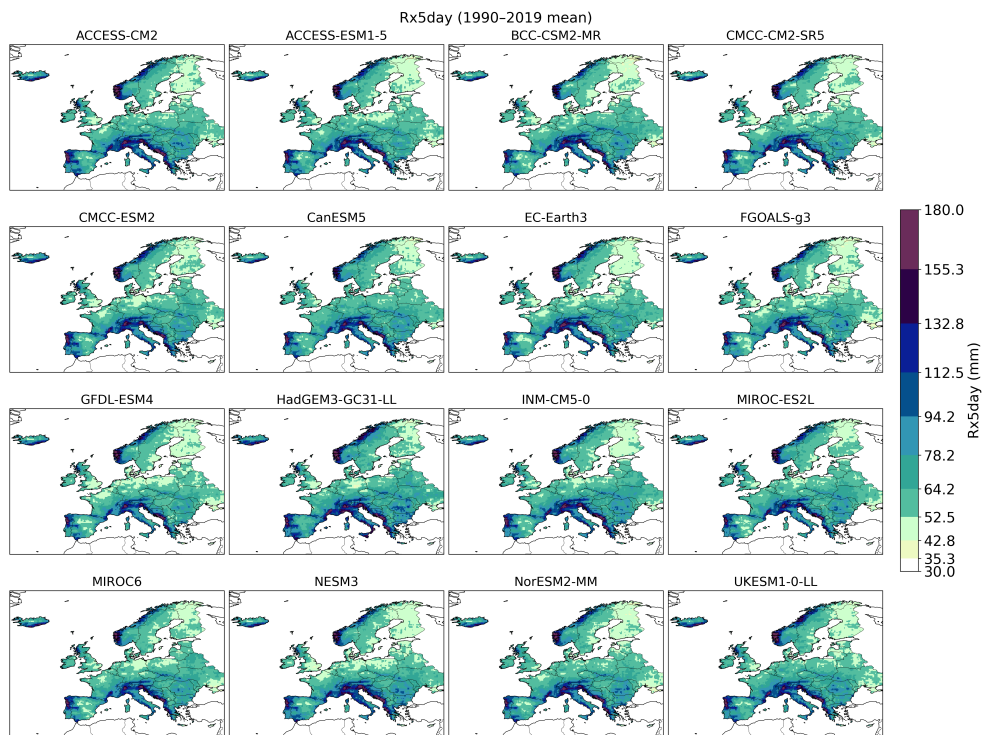

**Fig. S12** Rx5day by each GPCIR model ensemble member used in this study

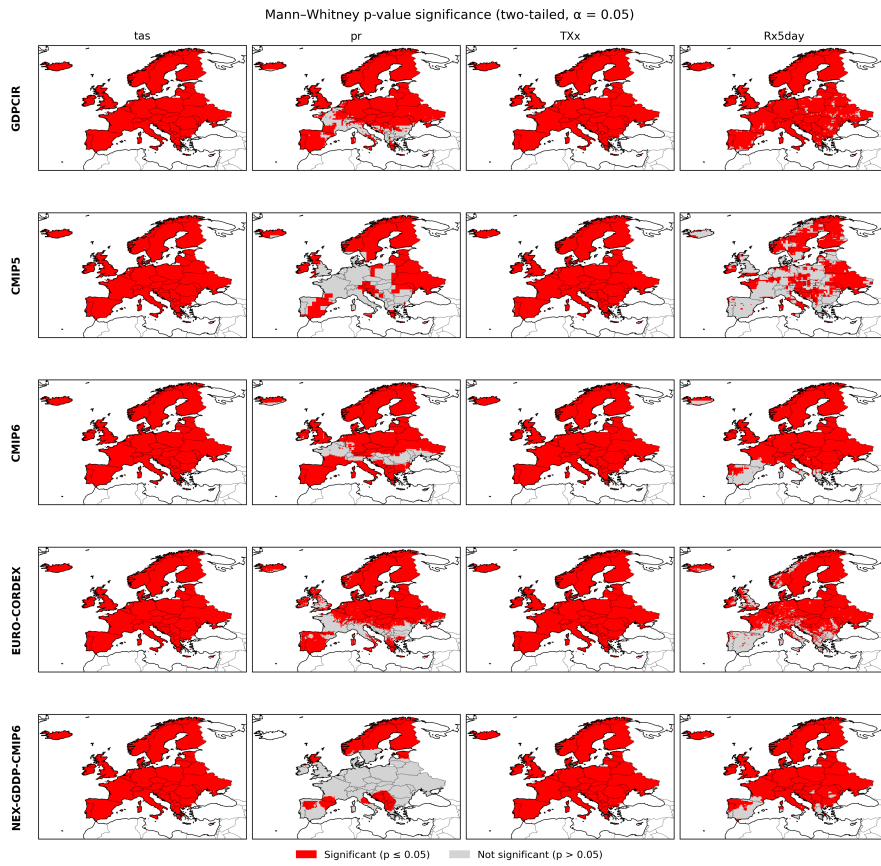

**Fig. S13** Statistical significance of the differences between the historical (1990-2019) and future (2071-2100) climate variables (tas, pr, TXx, Rx5day) based on different climate model ensemble outputs. The Mann-Whitney U-test was applied to determine the statistical significance.

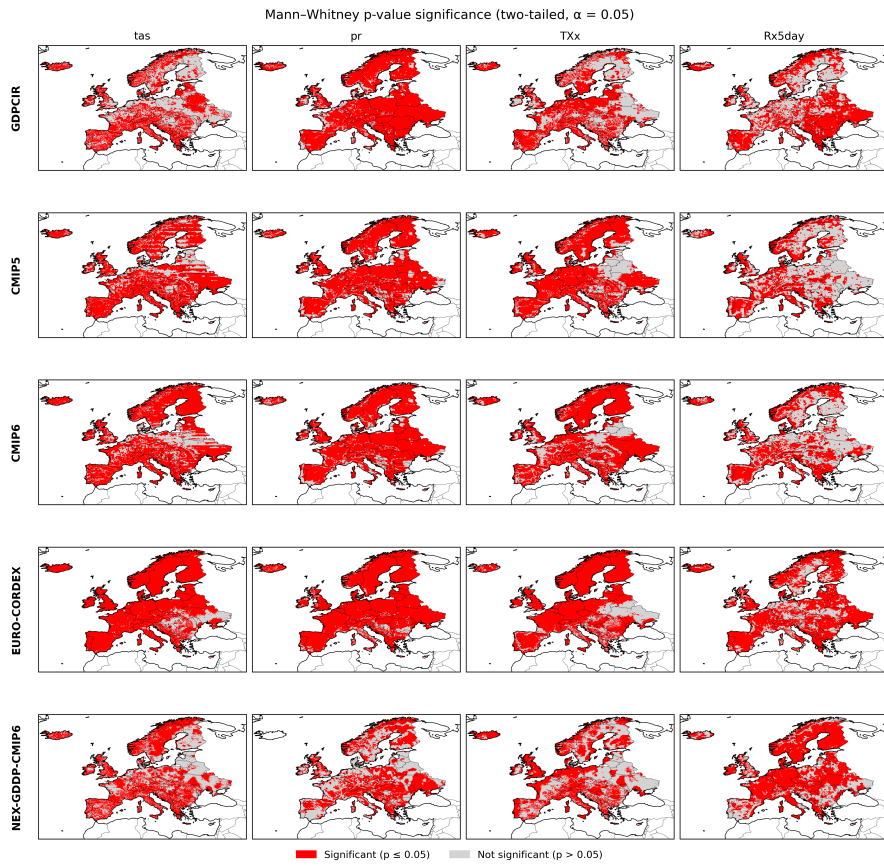

**Fig. S14** Statistical significance of how much each climate variable (tas, pr, TXx, Rx5day) calculated based on historical climate model data sets (1990-2019) differs from those calculated based on the observational reference E-OBS (1990-2019). The Mann-Whitney U-test was applied to determine the statistical significance.

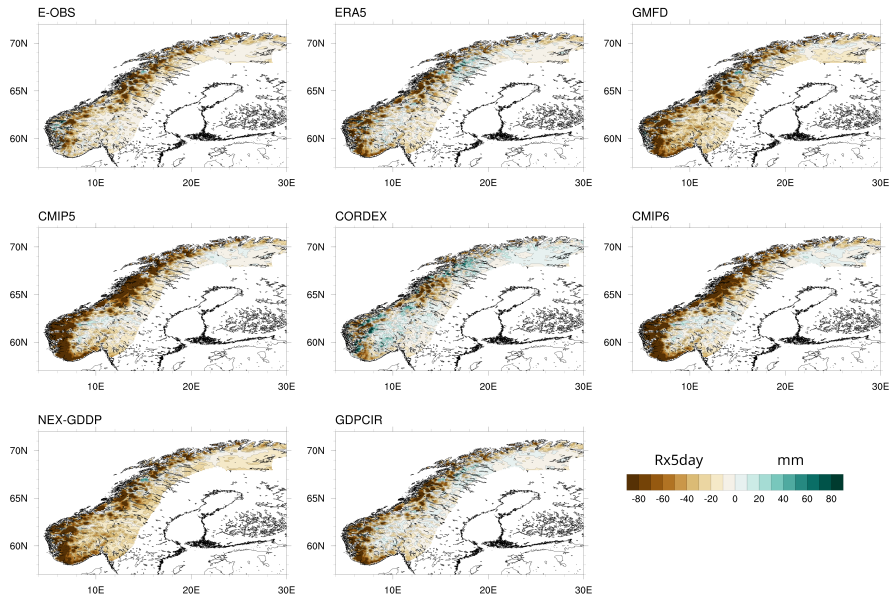

**Fig. S15** Average Rx5day based on the historical climate model datasets (1990-2019) compared to an observational gridded dataset for Norway, seNorge.

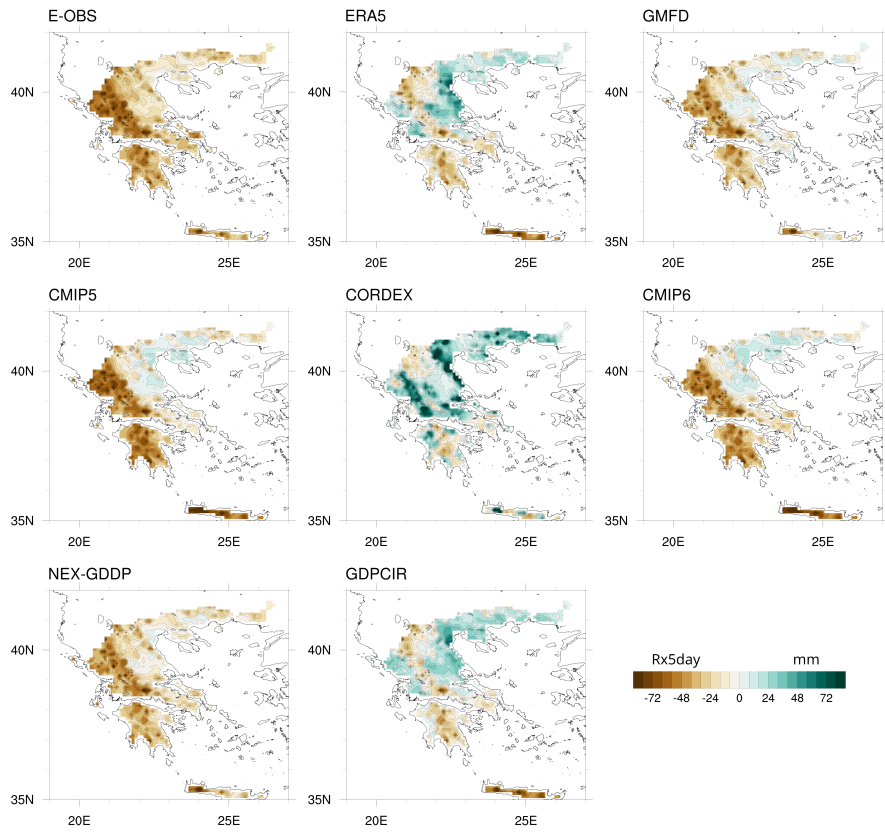

**Fig. S16** Average Rx5day based on the historical climate model datasets (1990-2019) compared to a high-resolution gridded precipitation dataset for Greece, CLIMADAT-GRid
